# Supplementary material for: Cancer Incidence and Mortality during the Intervention and Postintervention Periods of the Women's Health Initiative Dietary Modification Trial
Source: Oxford University Press journal article supplement (doi:10.1158/1055-9965.epi-14-0922), 2014-09-26
Supplement: 10559965epi140922-sup-135866_1_supp_2662496_nc0jtp.docx [file 10559965epi140922-sup-135866_1_supp_2662496_nc0jtp.docx]

| **Supplementary Table 1. Percentage of Participants Enrolled in the Women’s Health Initiative Dietary Modification Trial Who Were Alive and Not Withdrawn on March 31, 2005 Who Consented to Extended Follow-up (n=45560[[1]](#footnote-1))** | | | | | |
| --- | --- | --- | --- | --- | --- |
|  | **Intervention**  (n=18207) | | **Comparison**  (n=27353) | |  |
|  | **N** | **%** | **N** | **%** | **P-Value[[2]](#footnote-2)** |
| **Overall** | **14769** | **81.1** | **23089** | **84.4** | **<0.001** |
| **Baseline characteristics** |  |  |  |  |  |
| Age group at screening |  |  |  |  | 0.22 |
| 50-59 | 5616 | 81.7 | 8818 | 85.7 |  |
| 60-69 | 7030 | 82.9 | 10919 | 85.5 |  |
| 70-79 | 2123 | 74.4 | 3352 | 78.0 |  |
| Race/ethnicity |  |  |  |  | 0.03 |
| White | 12299 | 83.1 | 19348 | 86.6 |  |
| Black | 1469 | 74.0 | 2150 | 74.6 |  |
| Hispanic | 451 | 64.2 | 724 | 71.3 |  |
| American Indian | 60 | 73.2 | 73 | 74.5 |  |
| Asian/Pacific Islander | 312 | 77.6 | 514 | 80.3 |  |
| Unknown | 178 | 73.6 | 280 | 76.5 |  |
| Education |  |  |  |  | 0.91 |
| ≤ High school/GED or less | 3046 | 77.6 | 4873 | 81.3 |  |
| School after high school | 5699 | 79.7 | 8972 | 83.4 |  |
| College degree or higher | 5935 | 84.6 | 9111 | 87.4 |  |
| Body-mass index (kg/m2), baseline |  |  |  |  | 0.57 |
| <25 | 3992 | 83.4 | 6214 | 86.7 |  |
| 25 - <30 | 5285 | 81.7 | 8373 | 85.1 |  |
| ≥30 | 5429 | 79.0 | 8393 | 82.1 |  |
| Smoking status |  |  |  |  | 0.09 |
| Never | 7684 | 82.0 | 12002 | 84.6 |  |
| Past | 6071 | 80.8 | 9450 | 84.9 |  |
| Current | 850 | 75.9 | 1429 | 81.6 |  |
| Alcohol use |  |  |  |  | 0.37 |
| Non Drinker | 5882 | 78.4 | 9286 | 81.9 |  |
| <= 1 drink/day | 7363 | 83.0 | 11417 | 85.8 |  |
| > 1 drink/day | 1464 | 83.8 | 2306 | 88.0 |  |
| Bilateral oophorectomy |  |  |  |  | 0.69 |
| No | 11555 | 81.6 | 17950 | 84.8 |  |
| Yes | 2908 | 80.3 | 4698 | 84.0 |  |
| Treated diabetes (pills or shots) |  |  |  |  | 0.90 |
| No | 14222 | 81.5 | 22213 | 84.8 |  |
| Yes | 545 | 72.0 | 874 | 76.7 |  |
| Hypertensive (Self-report or high BP) |  |  |  |  | 0.002 |
| No | 7459 | 82.5 | 11597 | 86.6 |  |
| Yes | 6116 | 79.6 | 9576 | 81.9 |  |
| History of high cholesterol requiring pills |  |  |  |  | 0.71 |
| No | 11684 | 81.9 | 18148 | 85.0 |  |
| Yes | 1448 | 77.8 | 2356 | 81.9 |  |
| Statin Use |  |  |  |  | 0.37 |
| No | 13906 | 81.3 | 21680 | 84.5 |  |
| Yes | 863 | 78.5 | 1409 | 83.3 |  |
| Aspirin use ≥80 mg for at least 30 days |  |  |  |  | 0.88 |
| No | 12169 | 81.0 | 18856 | 84.3 |  |
| Yes | 2600 | 81.8 | 4233 | 84.9 |  |
| Multivitamin use > 5 yrs |  |  |  |  | 0.37 |
| No | 12336 | 80.7 | 19319 | 83.9 |  |
| Yes | 2432 | 83.2 | 3770 | 86.9 |  |
| History of angina |  |  |  |  | 0.25 |
| No | 14078 | 81.4 | 21953 | 84.6 |  |
| Yes | 606 | 74.8 | 1020 | 80.9 |  |
| History of CABG/PTCA |  |  |  |  | 0.52 |
| No | 14442 | 81.2 | 22600 | 84.6 |  |
| Yes | 136 | 70.5 | 212 | 77.7 |  |
| Stroke ever |  |  |  |  | 0.23 |
| No | 14653 | 81.3 | 22873 | 84.5 |  |
| Yes | 116 | 65.9 | 216 | 75.8 |  |
| History of DVT or PE |  |  |  |  | 0.42 |
| No | 14210 | 81.2 | 22120 | 84.4 |  |
| Yes | 554 | 78.9 | 957 | 83.9 |  |
| History of fracture age 55+ |  |  |  |  | 0.46 |
| No | 9024 | 81.7 | 14137 | 84.9 |  |
| Yes | 1533 | 80.5 | 2374 | 83.0 |  |
| Hysterectomy at randomization |  |  |  |  | 0.76 |
| No | 8498 | 82.1 | 13199 | 85.1 |  |
| Yes | 6270 | 79.9 | 9888 | 83.4 |  |
| HRT use status |  |  |  |  | 0.009 |
| Never used | 5965 | 80.0 | 9230 | 82.4 |  |
| Past user | 2041 | 79.1 | 3155 | 82.1 |  |
| Current user | 6750 | 82.8 | 10680 | 86.9 |  |
| Duration of unopposed estrogen use |  |  |  |  | 0.55 |
| None | 9284 | 81.3 | 14504 | 84.2 |  |
| < 5 Years | 2028 | 80.7 | 3106 | 84.3 |  |
| 5 - < 10 Years | 1108 | 82.8 | 1768 | 86.5 |  |
| 10 - < 15 Years | 885 | 81.6 | 1394 | 84.6 |  |
| 15+ | 1463 | 79.3 | 2317 | 84.3 |  |
| Duration of estrogen + progesterone use |  |  |  |  | 0.22 |
| None | 10534 | 80.1 | 16441 | 83.2 |  |
| < 5 Years | 2196 | 83.8 | 3418 | 87.6 |  |
| 5 - < 10 Years | 1149 | 84.1 | 1910 | 88.7 |  |
| 10 - < 15 Years | 615 | 84.0 | 936 | 87.5 |  |
| 15+ | 273 | 80.5 | 384 | 81.5 |  |
| Self-reported health |  |  |  |  | 0.11 |
| Excellent | 2509 | 85.0 | 3837 | 89.0 |  |
| Very good | 6284 | 83.6 | 9892 | 87.0 |  |
| Good | 4951 | 78.9 | 7747 | 81.8 |  |
| Fair/poor | 945 | 69.5 | 1511 | 73.3 |  |
| HT randomization |  |  |  |  | 0.42 |
| CEE active | 448 | 77.2 | 753 | 80.3 |  |
| CEE placebo | 499 | 81.1 | 794 | 81.6 |  |
| CEE+MPA active | 741 | 82.3 | 1140 | 84.4 |  |
| CEE+MPA placebo | 712 | 83.0 | 1028 | 85.2 |  |
| NR | 12369 | 81.1 | 19374 | 84.7 |  |
| History of hypertension |  |  |  |  | 0.005 |
| Never hypertensive | 8744 | 82.1 | 13581 | 86.0 |  |
| Untreated hypertensive | 1045 | 81.5 | 1649 | 83.5 |  |
| Treated hypertensive | 3416 | 79.7 | 5364 | 81.4 |  |
| Tertiles of systolic blood pressure at baseline (mmHg) |  |  |  |  | 0.07 |
| < 119 | 4752 | 82.9 | 7360 | 86.8 |  |
| 119 - < 134 | 5281 | 81.2 | 8273 | 84.7 |  |
| ≥134 | 4735 | 79.3 | 7456 | 81.9 |  |
| Tertiles of % dietary fat at baseline |  |  |  |  | 0.93 |
| < 35 | 4995 | 82.8 | 7748 | 85.9 |  |
| 35-<39 | 5014 | 81.5 | 7897 | 84.6 |  |
| ≥ 39 | 4691 | 79.2 | 7356 | 82.8 |  |
| **Characteristics after Randomization** |  |  |  |  |  |
| Age at Extension |  |  |  |  | 0.21 |
| <65 | 2700 | 81.3 | 4232 | 84.7 |  |
| 65-<70 | 3937 | 82.4 | 6079 | 86.4 |  |
| 70-<75 | 3675 | 83.4 | 5810 | 85.9 |  |
| 75-<80 | 2818 | 81.9 | 4352 | 84.2 |  |
| 80-<85 | 1327 | 73.8 | 2135 | 79.6 |  |
| ≥85 | 312 | 66.8 | 481 | 68.1 |  |
| Self-reported health at Close-out |  |  |  |  | 0.91 |
| Excellent | 1693 | 92.0 | 2359 | 93.6 |  |
| Very good | 5559 | 91.3 | 8547 | 93.0 |  |
| Good | 5101 | 88.8 | 8334 | 90.6 |  |
| Fair/poor | 1447 | 84.8 | 2448 | 87.3 |  |
| Poor | 137 | 72.9 | 229 | 80.1 |  |
| Tertiles of % dietary fat during Follow-up (%) |  |  |  |  | <0.001 |
| < 29 | 9984 | 85.2 | 2518 | 83.8 |  |
| 29-<36 | 3366 | 78.0 | 9409 | 86.3 |  |
| ≥ 36 | 1306 | 72.4 | 11003 | 85.1 |  |
| Tertiles of % dietary saturated fat during Follow-up (%) |  |  |  |  | <0.001 |
| < 9 | 9504 | 85.0 | 2924 | 83.0 |  |
| 9-<12 | 3676 | 78.7 | 9120 | 86.2 |  |
| ≥ 12 | 1476 | 74.4 | 10886 | 85.6 |  |
| Tertiles of fiber (g per 10000 calories) Follow-up (%) |  |  |  |  | <0.001 |
| < 9 | 2152 | 76.0 | 9998 | 84.6 |  |
| 9-<12 | 4483 | 81.3 | 8407 | 86.5 |  |
| ≥ 12 | 8021 | 84.5 | 4525 | 85.5 |  |
| Tertiles of BMI during Follow-up (kg/m2) |  |  |  |  | 0.08 |
| < 26 | 5233 | 84.5 | 7325 | 87.0 |  |
| 26 -< 31 | 4859 | 81.8 | 7949 | 86.5 |  |
| ≥ 31 | 4494 | 80.2 | 7525 | 84.3 |  |
| Tertiles of systBP during Follow-up (mmHg) |  |  |  |  | 0.72 |
| < 119 | 5085 | 84.1 | 7641 | 87.8 |  |
| 119 - < 130 | 5007 | 83.2 | 7970 | 86.7 |  |
| ≥ 130 | 4499 | 79.2 | 7191 | 83.2 |  |
| Self report of treated diabetes during Follow-up |  |  |  |  | 0.04 |
| No | 13673 | 81.3 | 21329 | 84.8 |  |
| Yes | 1096 | 79.3 | 1760 | 80.4 |  |
| Self report of treated hypertension during Follow-up |  |  |  |  | 0.66 |
| No | 10871 | 81.1 | 16884 | 84.3 |  |
| Yes | 3898 | 81.1 | 6205 | 84.6 |  |

1. Includes all eligible women in the DM trial. [↑](#footnote-ref-1)
2. P-value from a logistic regression model testing whether consent rates between intervention and control differ by subgroup. [↑](#footnote-ref-2)
