# Supplementary material for: Cancer Incidence and Mortality during the Intervention and Postintervention Periods of the Women's Health Initiative Dietary Modification Trial
Source: Oxford University Press journal article supplement (doi:10.1158/1055-9965.epi-14-0922), 2014-09-26

**Supplementary Fig. 1. Longitudinal plots of mean (95% CI) percentage of energy as fat during follow-up and the extension period, stratified by quartiles of percentage energy as fat at baseline. Estimates of mean (95% CI) for percentage of energy from fat were based on 24-hour dietary recall.**


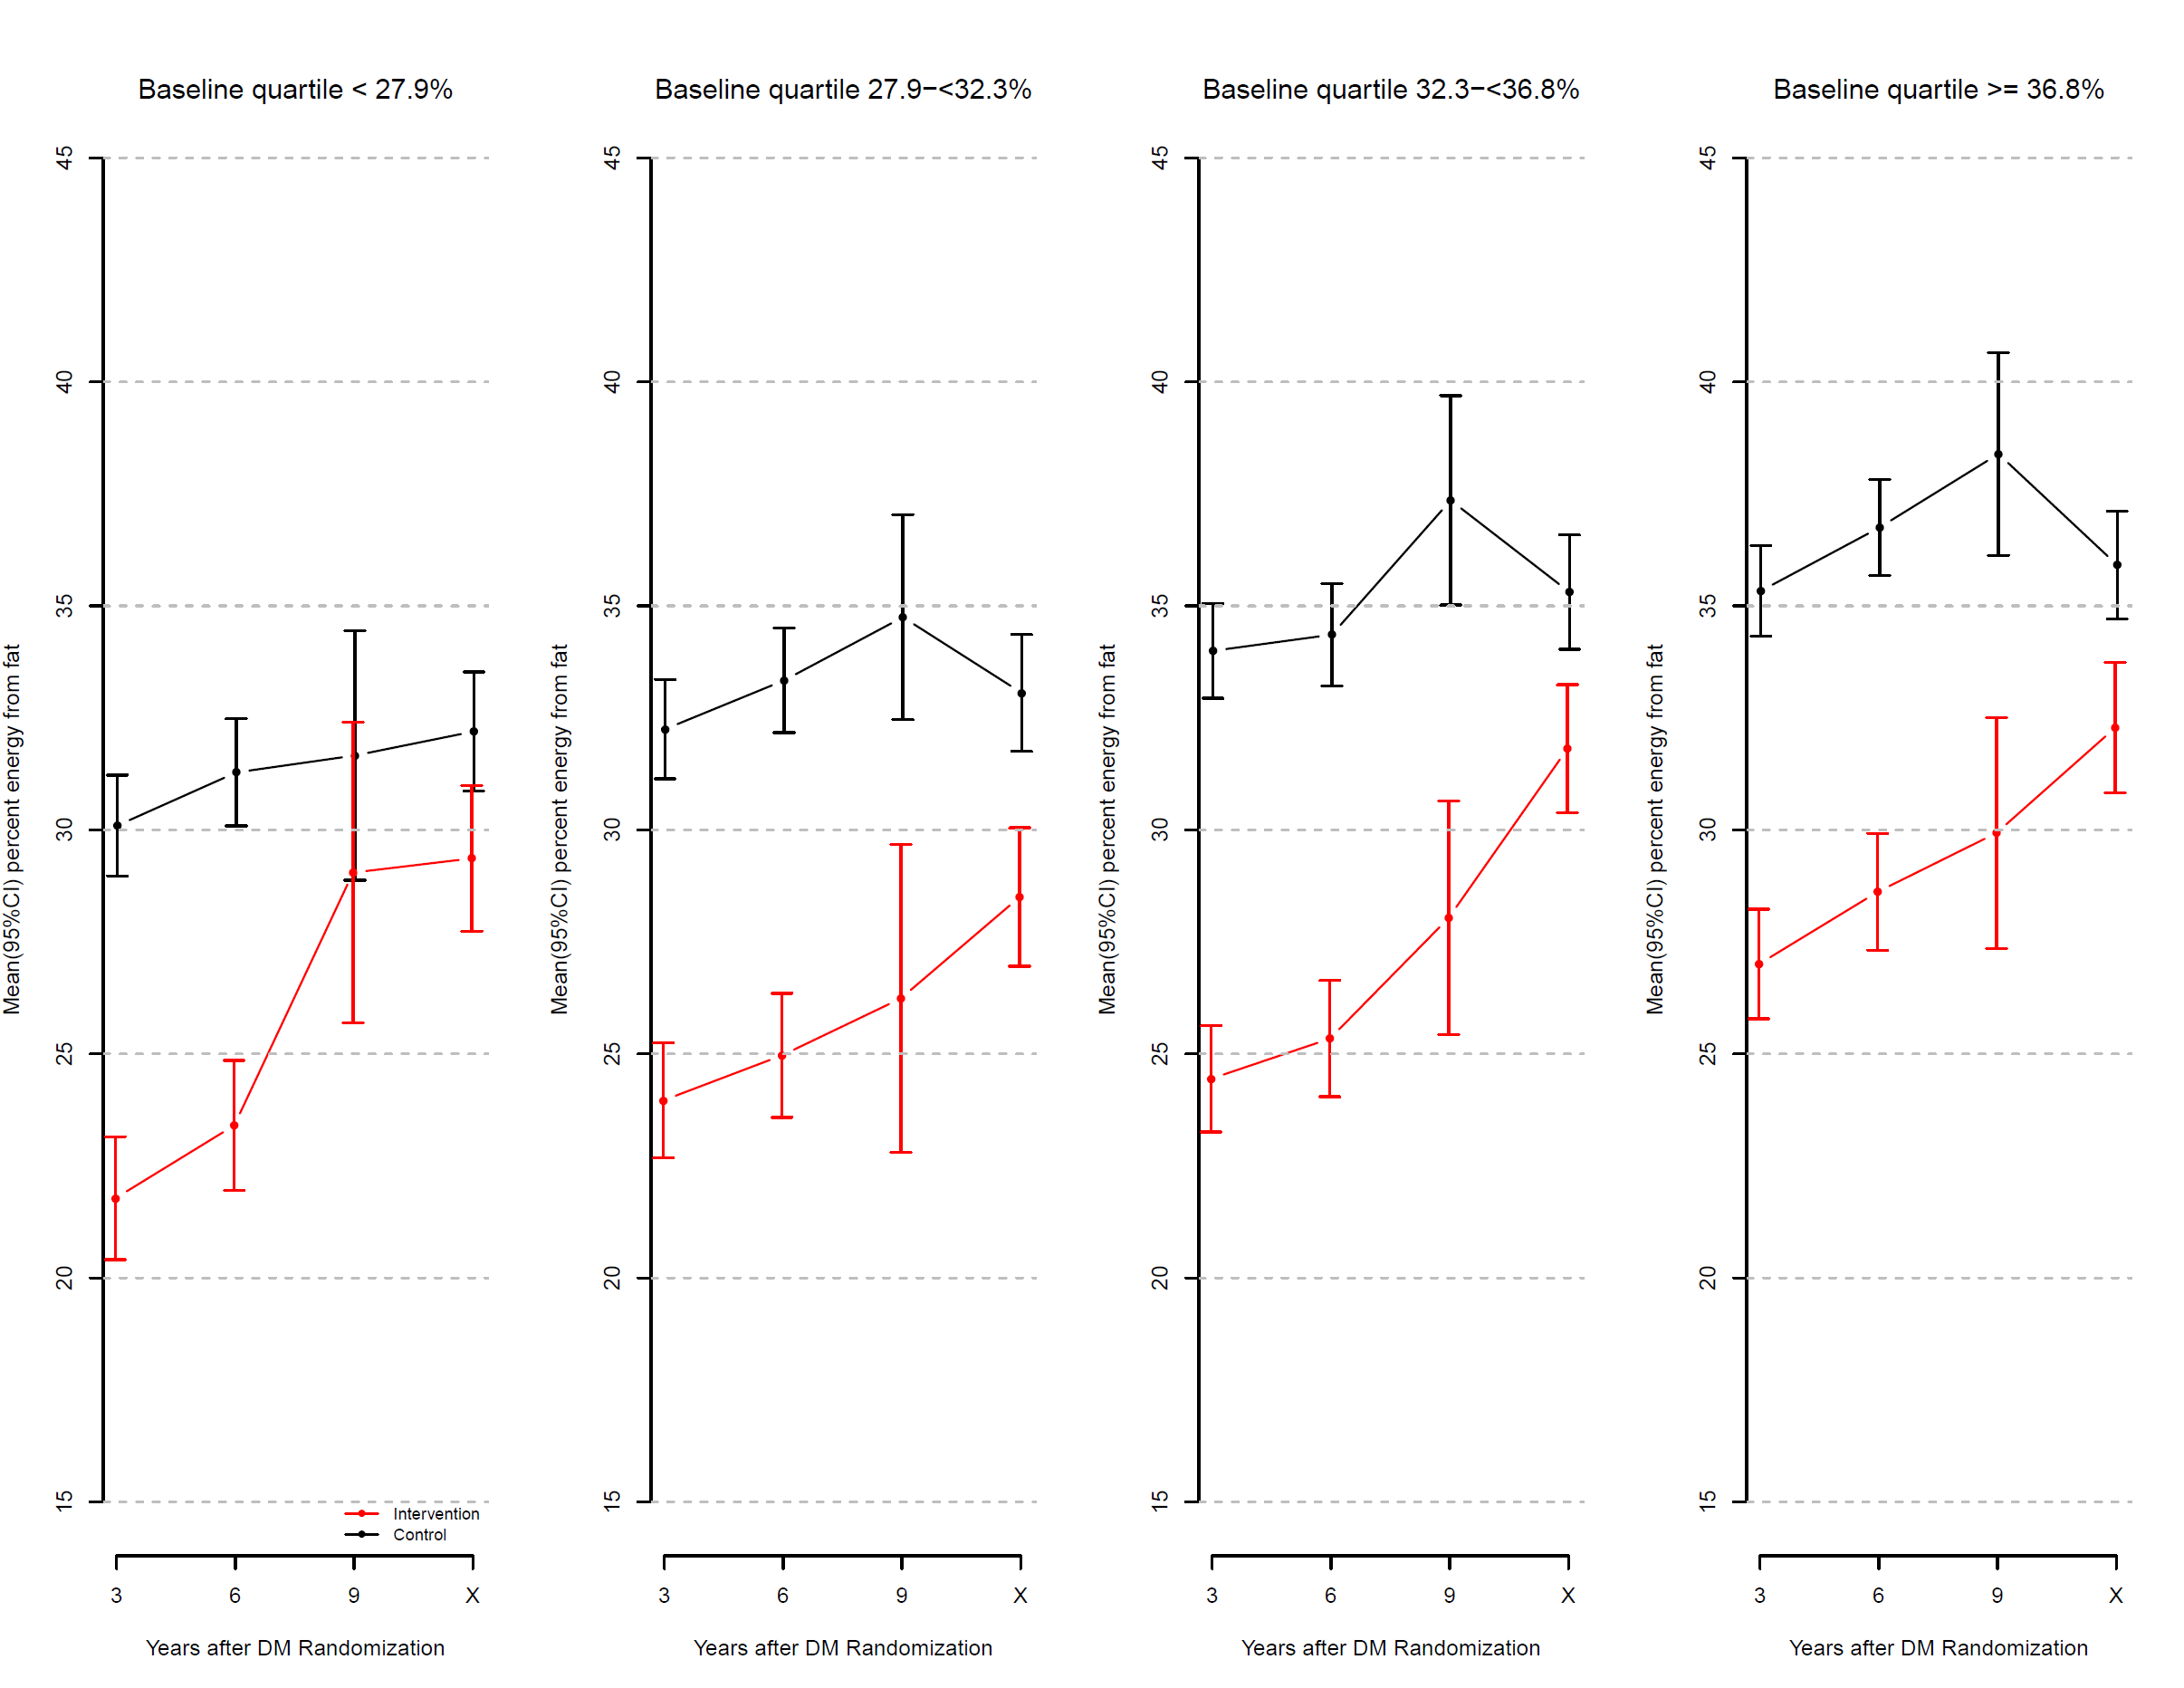

Supplement: 10559965epi140922-sup-135866_1_supp_2662498_nc0btp.docx [file 10559965epi140922-sup-135866_1_supp_2662498_nc0btp.docx]
